# Supplementary material for: Visible light assisted hydrogen generation from complete decomposition of hydrous hydrazine using rhodium modified TiO2 photocatalysts
Source: Royal Society of Chemistry journal article supplement (doi:10.1039/c6pp00432f), 2017-05-26
Supplement: c6pp00432f1.pdf [file c6pp00432f1.pdf]

## **Supporting Information**

on

### **Visible light assisted hydrogen generation from complete decomposition of hydrous hydrazine using rhodium modified TiO<sub>2</sub> photocatalyst**

Pawan Kumar,<sup>1,2</sup> Anurag Kumar<sup>1,2</sup> Clémence Queffélec,<sup>3</sup> Dietrich, Gudat,<sup>4</sup> Qi Wang,<sup>5</sup> Suman L. Jain,<sup>1\*</sup> Rabah Boukherroub<sup>6</sup> and Sabine Szunerits<sup>6\*</sup>

<sup>1</sup>*Chemical Sciences Division, CSIR–Indian Institute of Petroleum, Dehradun India 248005*

<sup>2</sup>*Academy of Scientific and Industrial Research (AcSIR), New Delhi, 110001, India*

<sup>3</sup>*Chimie Et Interdisciplinarité : Synthèse Analyse Modélisation (CEISAM), Université de Nantes, CNRS, UMR 6230, 2, rue de la Houssinière, BP 92208, 44322 Nantes Cedex 3, France.*

<sup>4</sup>*Institut für Anorganische Chemie, University of Stuttgart, Pfaffenwaldring 55, 70550 Stuttgart, Germany*

<sup>5</sup>*Key Laboratory for Liquid-Solid Structural Evolution and Processing of Materials, Shandong University, Jinan 250061, China*

<sup>6</sup>*Univ. Lille, CNRS, Centrale Lille, ISEN, Univ. Valenciennes, UMR 8520 - IEMN, F-59000 Lille*

\*Corresponding Authors: Suman L. Jain: [suman@iip.res.in](mailto:suman@iip.res.in); Sabine Szunerits: [sabine.szunerits@univ-lille1.fr](mailto:sabine.szunerits@univ-lille1.fr)

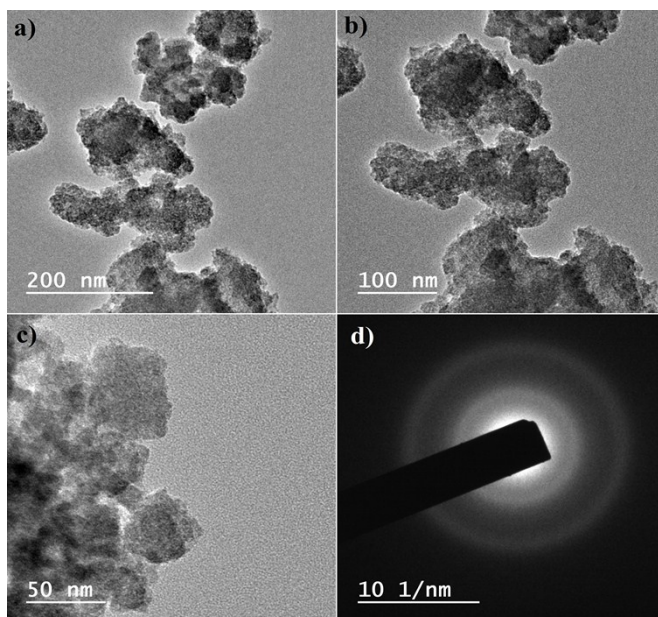

**Fig. S1.** HR-TEM images of  $\text{TiO}_2$ -Rh nanoparticles after reaction

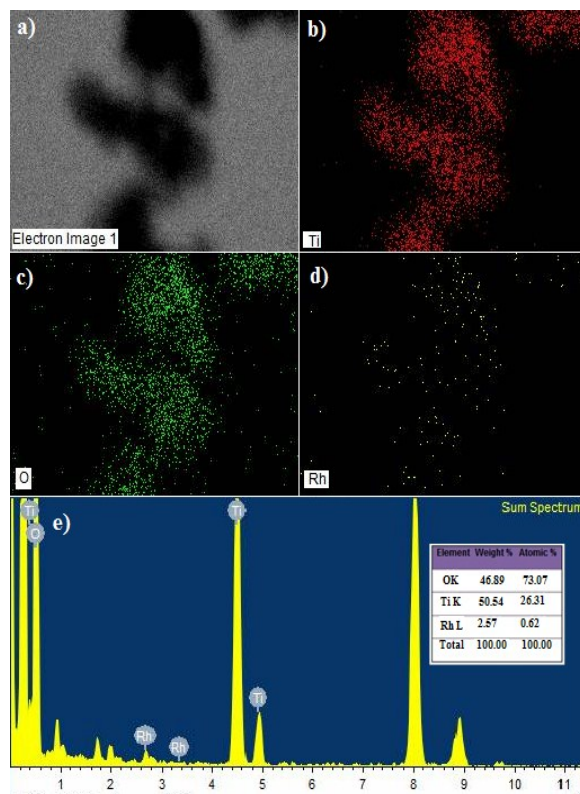

**Fig. S2.** HR-TEM elemental mapping of  $\text{TiO}_2$ -Rh nanoparticles after reaction a) electron image, b) titanium, c) oxygen, d) Rhodium, and e) EDX pattern showing elemental composition.

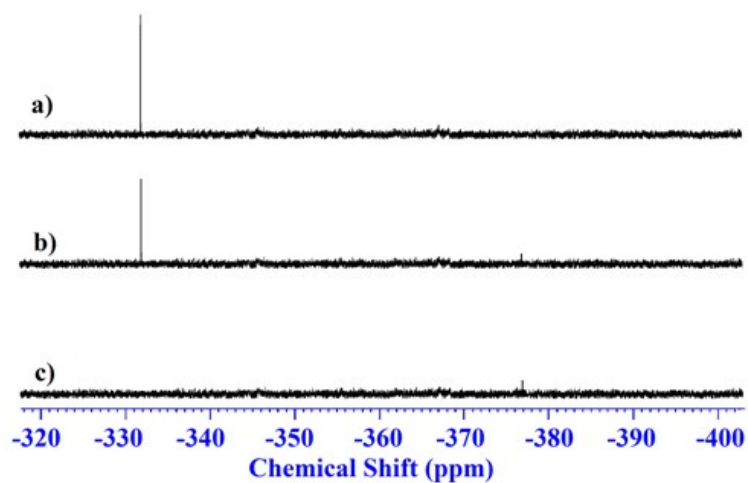

**Fig. S3.** <sup>15</sup>N NMR spectra (signal of an external reference (CD<sub>3</sub>NO<sub>2</sub>) were used as a lock, δ = 0.0): a) Hydrazine solution before reaction, b) reaction mixture after 6 h of (a), and c) after completion of the reaction (12 h) of (a) by using TiO<sub>2</sub>-Rh NP photocatalyst.

**Table S1:** Chemical composition (at %) determined from XPS survey spectra of initial particles and after 5 catalytic runs

| Cycle N° | C <sub>1s</sub> | O <sub>1s</sub> | Ti <sub>2p</sub> | P <sub>2p</sub> | Rh <sub>3d</sub> |
|----------|-----------------|-----------------|------------------|-----------------|------------------|
| 0        | 47.8            | 38.0            | 9.7              | 3.6             | 1.1              |
| 1        | 49.3            | 37.3            | 9.4              | 3.0             | 1.0              |
| 5        | 47.3            | 39.5            | 9.2              | 3.1             | 0.9              |
